# Supplementary material for: Effects of Metal–Support Interaction in the Electrocatalysis of the Hydrogen Evolution Reaction of the Metal-Decorated Titanium Dioxide Supported Carbon
Source: MDPI journal article supplement (doi:10.3390/catal13010022), 2022-12-23
Supplement: s1 [file s1]

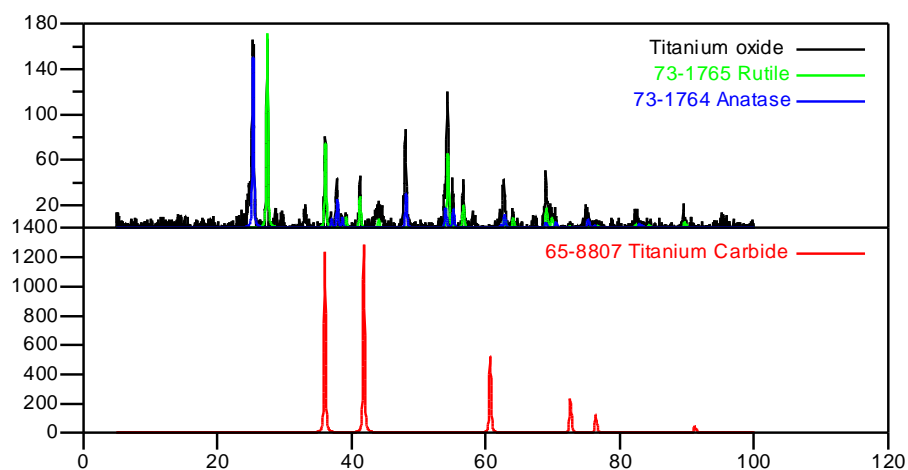

**Figure S1.** Comparison of the diffraction parameters of the  $\text{TiO}_2/\text{C}$  material and of the TiC JCPDS and of the anatase and rutile phases of titanium oxide.

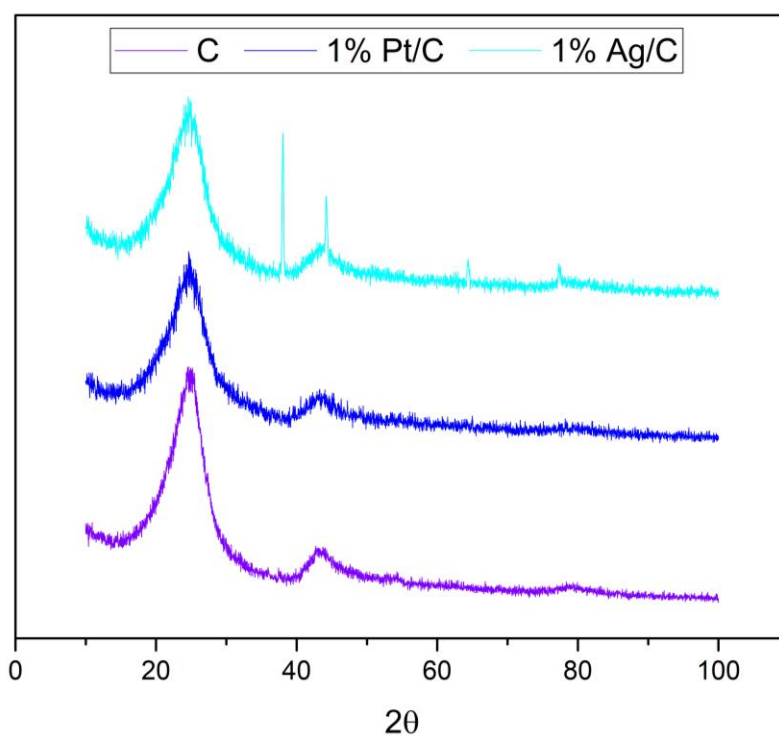

**Figure S2.** Diffraction parameters of M/C and C materials.

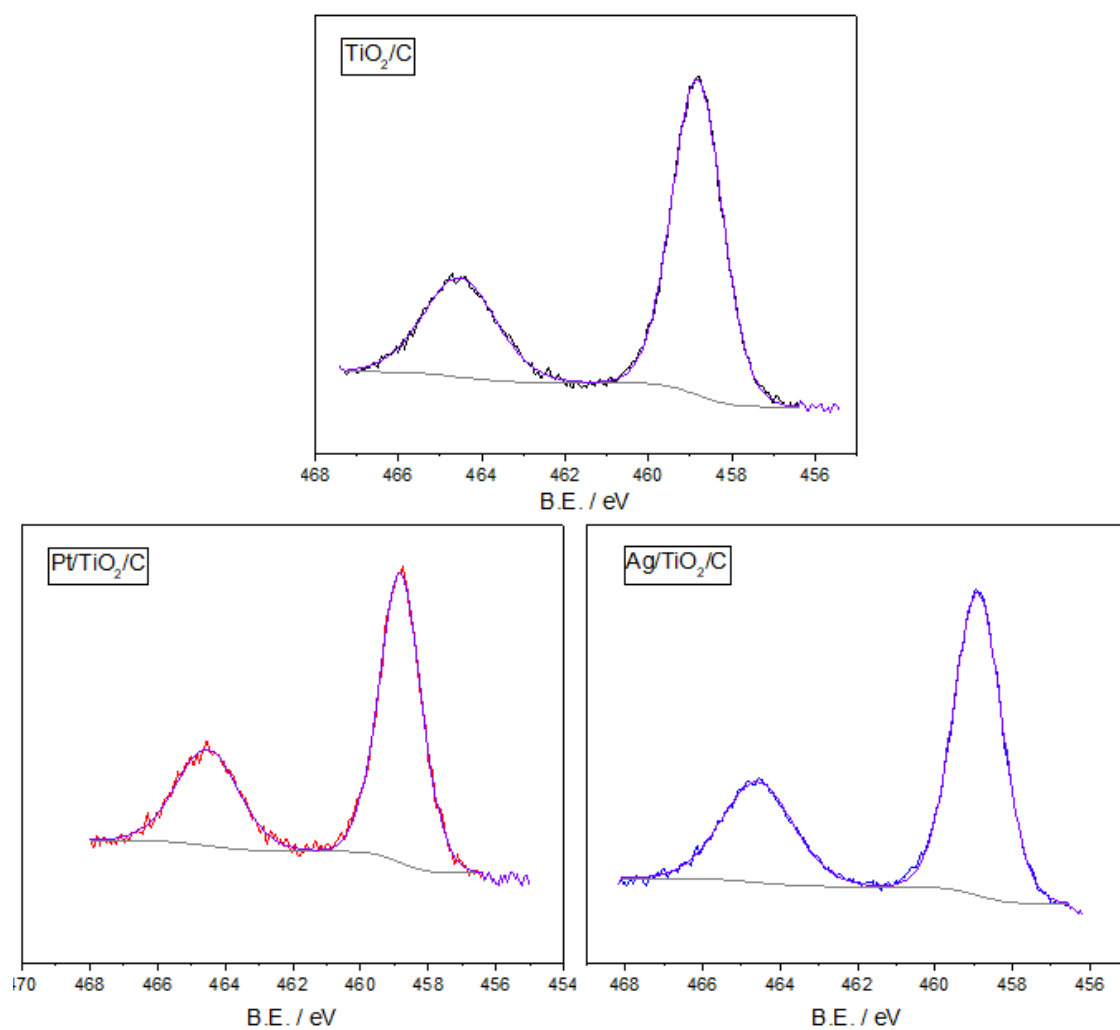

**Figure S3.** Adjustment of the Ti 2p spectra for TiO<sub>2</sub>/C, 1% Pt/TiO<sub>2</sub>/C and 1% Ag/TiO<sub>2</sub>/C catalysts.

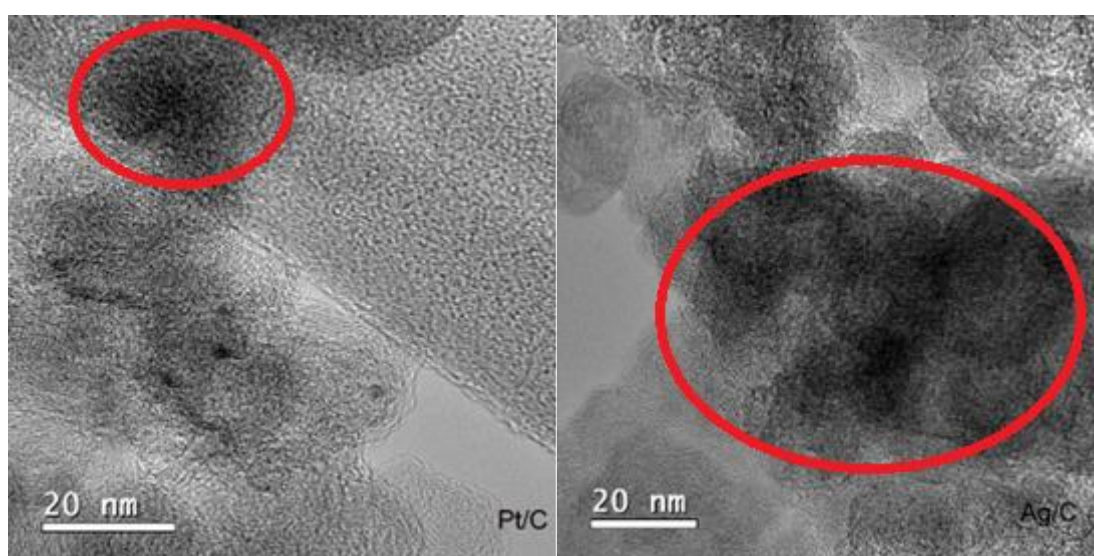

**Figure S4.** HR-TEM images obtained for 1% Pt/C (left) and 1% Ag/C (right).

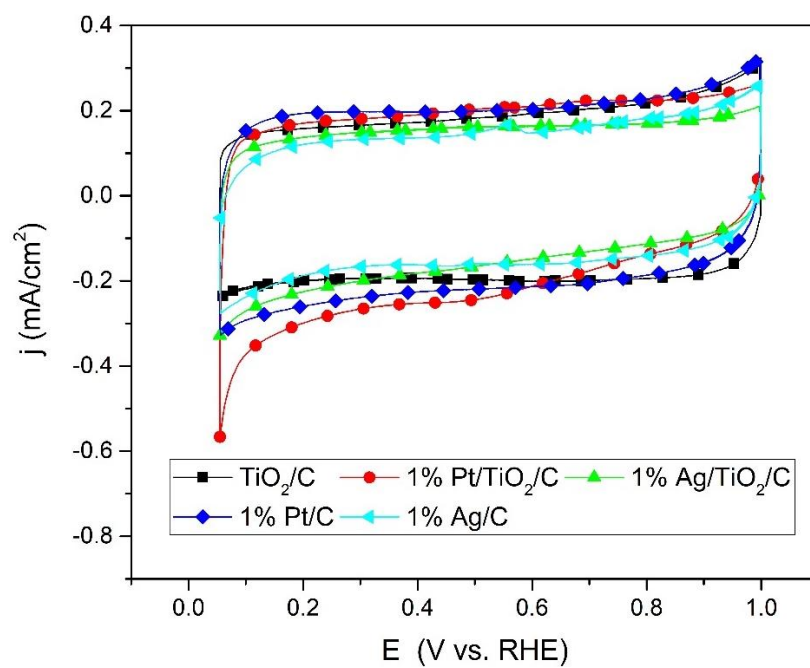

**Figure S5.** Cyclic voltammetry curves for M/ $\text{TiO}_2$ /C and M/C catalysts in 0.5 M  $\text{H}_2\text{SO}_4$  at  $50 \text{ mV s}^{-1}$ .

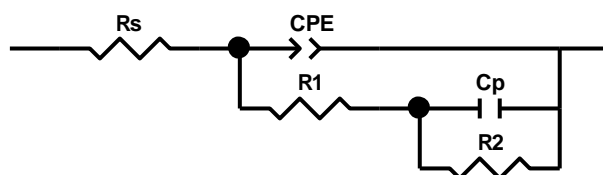

**Figure S6.** Electric equivalent circuit (EEC) model proposed by Armstrong and Henderson.

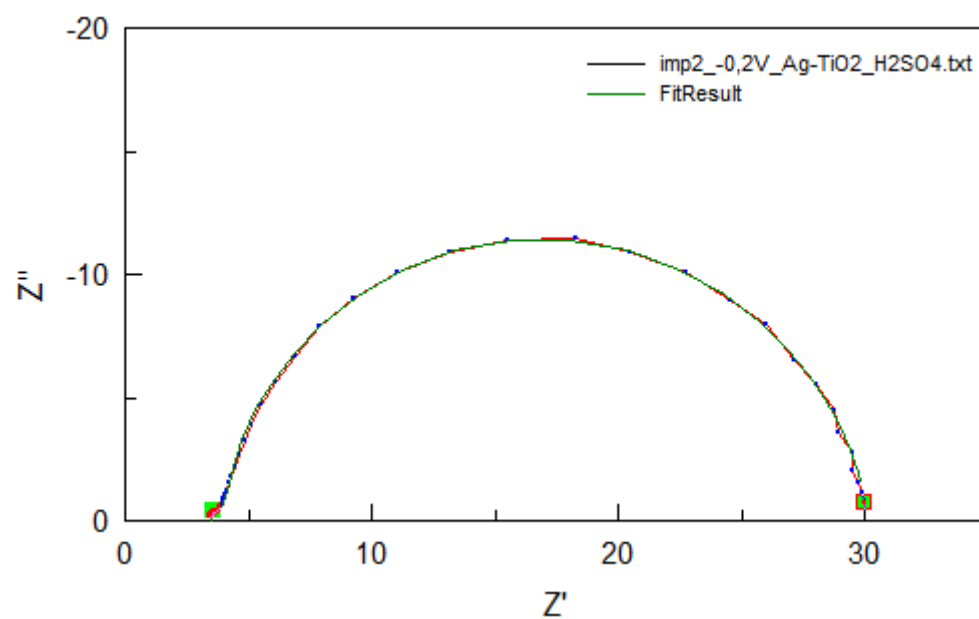

**Figure S7.** Adjustment of impedance spectroscopy of Ag/TiO<sub>2</sub>/C.
